# Supplementary material
Source: PubMed Central journal article supplement (PMC404692)
Supplement: pnas_0730811100_2.pdf [file pnas_0730811100_2.pdf]

Supporting information for Van Ness *et al.* (2003) *Proc. Natl. Acad. Sci. USA*,  
10.1073/pnas.0730811100

**Table 1. The sequences of the target sites in the cDNA (nicking enzyme recognition sites are in bold) corresponding to the trigger templates, and the signal sequences (in blue) measured in the mass spectrometer**

SOST Amplification Template: 3'-TGTGACTCGGTG**CTCAG**TGTCTGTGACTCGGTG-5'

–signal sequence = 5'-ACACTGAGCC AC (1224.5 m/z)

–cDNA = 5'-CGGGGCAGGG GAGGGAATTGAG**GAGTC**ACAG ACACTGAGCC AC

SIVA Amplification Template: 3'-TTCAGACCACAC **CTCAG** TGA**CTTC**AGACCACAC-5'

–signal sequence= 5'-AAGTCTGGTGTG (1263.5 m/z)

–cDNA = AAGATTGTTCCGTGAACCACCTGCAG**GAGTC**ACTGAAGTCTGGTGTG

NEURO: Amplification Template: 3'-ACGGGACGAGAT **CTCAG** GGGTACGGGACGAGAT-5'

–signal sequence = 5'-TGCCCTGCTCTA (1215.4 m/z)

–cDNA = CAGTTTCAGGGCCT**GAGTC**CCCATGCCCTGCTCTATGGGGGTGCG
