# Supplementary material
Source: PubMed Central journal article supplement (PMC404692)
Supplement: pnas_0730811100_3.pdf [file pnas_0730811100_3.pdf]

**Table 2. The results of experiments designed to detect, using triggered EXPAR reactions, the presence of specific cDNA sequences**

**Amplified Signal ( $\mu\text{M}$ ) in mix of 3 cDNAs**

| <b>Trigger<br/>Signal</b>      | SOST  | SIVA  | NEURO | SOST+<br>SIVA | SOST +<br>SIVA +<br>SOST | NONE |
|--------------------------------|-------|-------|-------|---------------|--------------------------|------|
| SOST<br>Signal (1224.5<br>m/z) | 0.355 | <.01  | <.01  | 0.078         | 0.048                    | <.01 |
| SIVA<br>Signal (1263.5<br>m/z) | <.01  | 0.274 | <.01  | 0.073         | 0.059                    | <.01 |
| OXY<br>Signal (1214.4<br>m/z)  | <.01  | <.01  | 0.316 | <.01          | 0.087                    | <.01 |

The three cDNA sequences present in each reaction were SIVA (gi:15126711), SOST (gi:13376845), and NEURO (gi:13259532). The table represents the concentration of signal sequence in the reaction as measured at the signal masses (10 injection per measurement; see *Materials and Methods*).
