# Supplementary material
Source: PubMed Central journal article supplement (PMC404692)

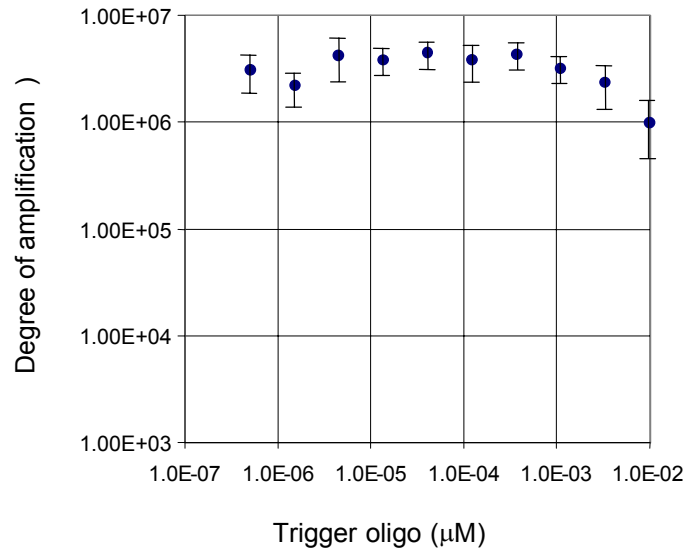

Supplement: pnas_0730811100_11.pdf [file pnas_0730811100_11.pdf]

a.

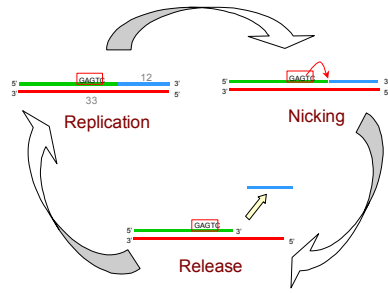

b.

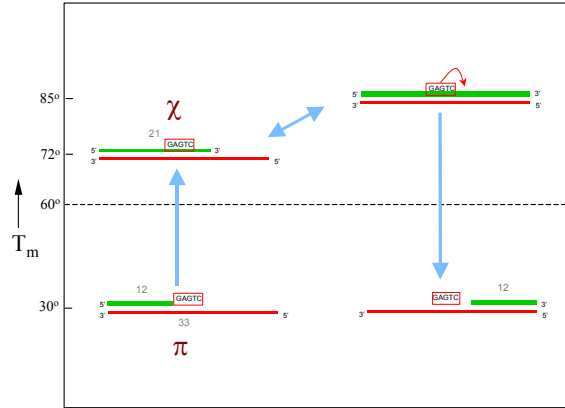

Supplement: pnas_0730811100_5.pdf [file pnas_0730811100_5.pdf]

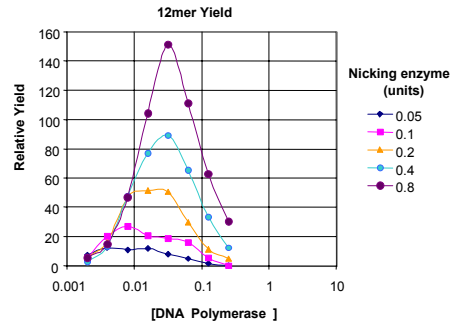

Supplement: pnas_0730811100_7.pdf [file pnas_0730811100_7.pdf]

Yield at 0.8 U Nicking enzyme

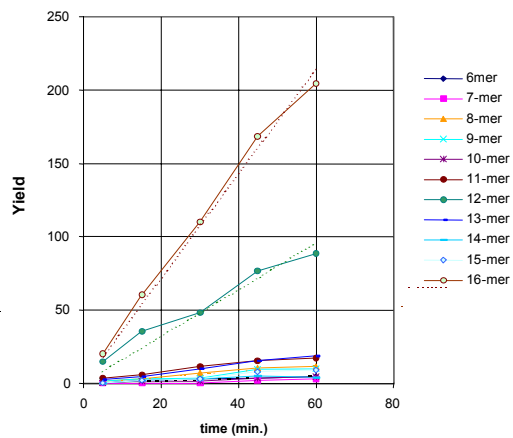

Supplement: pnas_0730811100_9.pdf [file pnas_0730811100_9.pdf]
